# Supplementary material for: The conversion of CO2 to methanol on orthorhombic β-Mo2C and Cu/β-Mo2C catalysts: mechanism for admetal induced change in the selectivity and activity
Source: Royal Society of Chemistry journal article supplement (doi:10.1039/c5cy02143j), 2016-01-01

## **The Conversion of CO<sub>2</sub> to Methanol on orthorhombic $\beta$ -Mo<sub>2</sub>C and Cu/ $\beta$ -Mo<sub>2</sub>C Catalysts: Mechanism for Admetal Induced Change in the Selectivity and Activity**

Sergio Posada-Pérez,<sup>a</sup> Pedro J. Ramírez,<sup>b</sup> Ramón A. Gutiérrez,<sup>b</sup> Dario J. Stacchiola,<sup>c</sup> Francesc Viñes,<sup>a,\*</sup> Ping Liu,<sup>c</sup> Francesc Illas<sup>a</sup> and José A. Rodríguez<sup>c,\*</sup>

<sup>a</sup> *Departament de Química Física & Institut de Química Teòrica i Computacional (IQTCUB), Universitat de Barcelona, c/ Martí i Franquès 1, 08028 Barcelona, Spain*

<sup>b</sup> *Facultad de Ciencias, Universidad Central de Venezuela, Caracas 1020-A, Venezuela*

<sup>c</sup> *Chemistry Department, Brookhaven National Laboratory, Upton, NY 11973, USA*

\*Corresponding authors: [francesc.vines@ub.edu](mailto:francesc.vines@ub.edu); [rodriguez@bnl.gov](mailto:rodriguez@bnl.gov)

**Figure S1.** Energy profile of CO<sub>2</sub> hydrogenation *via* HCOOH formation as predicted from a Cu<sub>4</sub>/β-Mo surface model

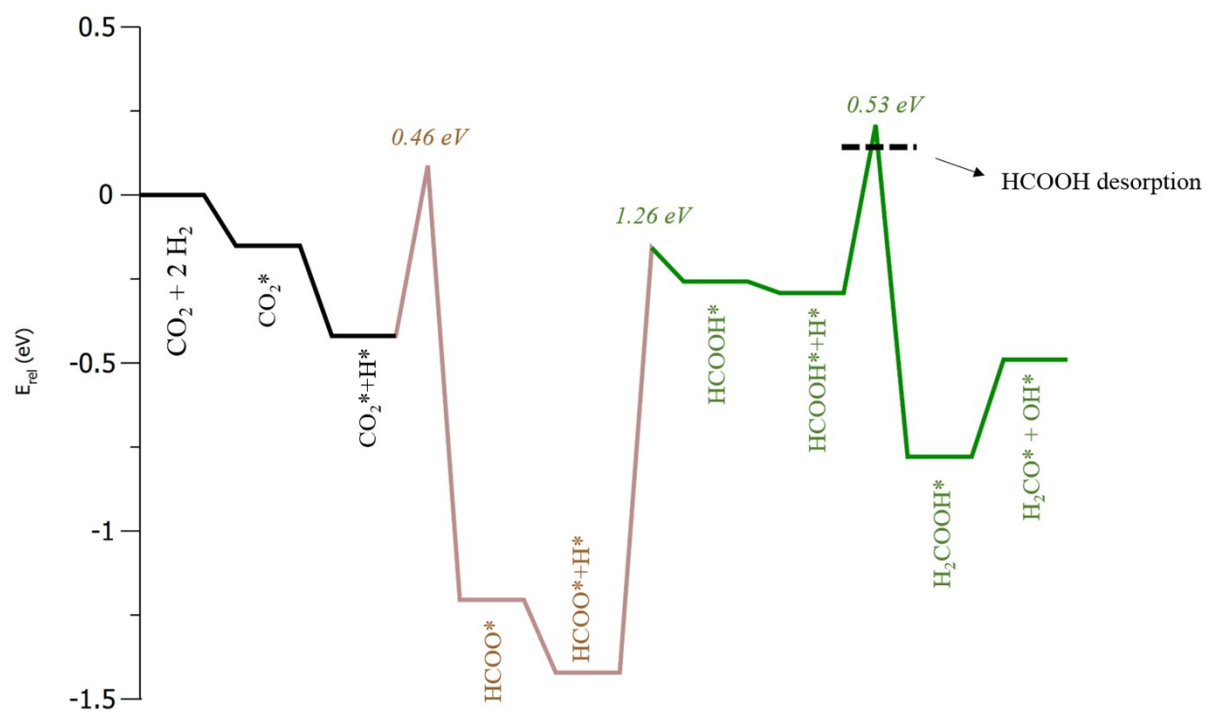

Supplement: c5cy02143j1.pdf [file c5cy02143j1.pdf]
